# Supplementary material for: MicroRNA-124 Dysregulation Is Associated With Retinal Inflammation and Photoreceptor Death in the Degenerating Retina
Source: PubMed Central journal article supplement — Invest Ophthalmol Vis Sci. 2018 Aug 10;59(10):4094. doi: 10.1167/iovs.18-24623 (PMC11647551; doi:10.1167/iovs.18-24623), 2018-08-10
Supplement: iovs-59-10-4094_s001.pdf [file iovs-59-10-4094_s001.pdf]

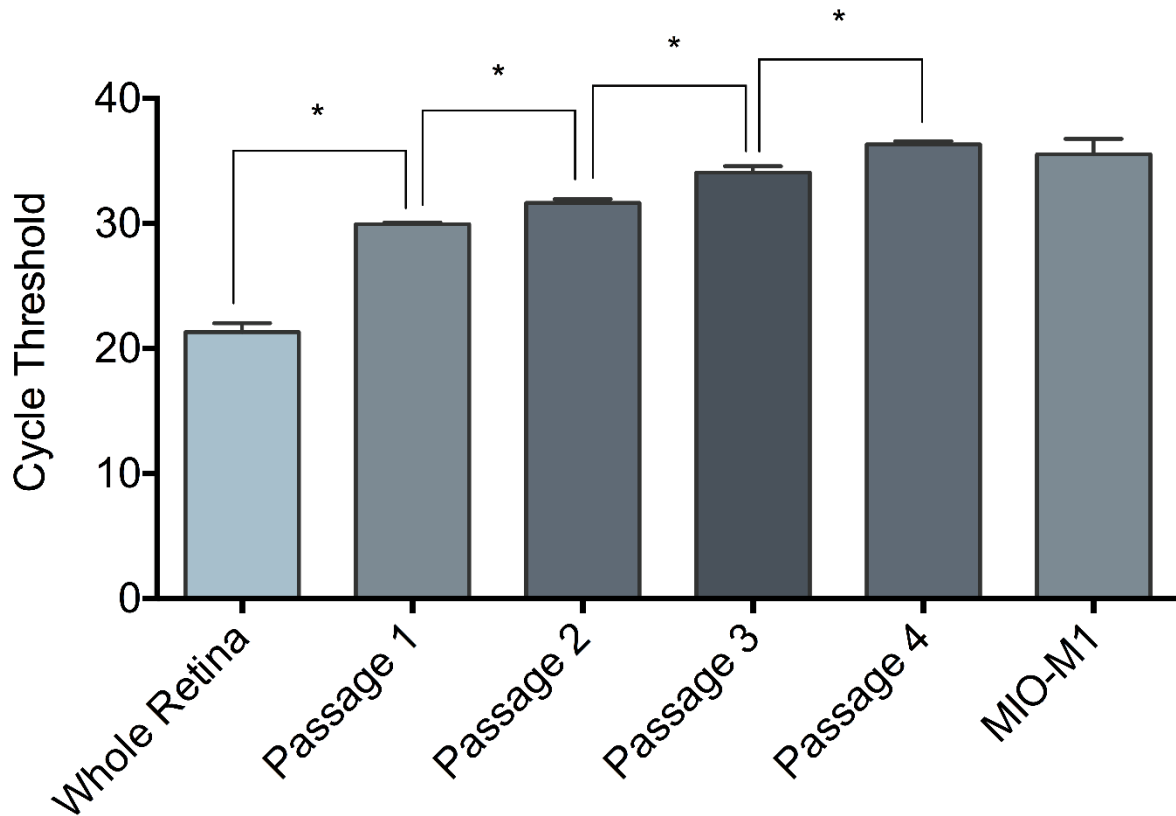

**Supplementary Figure 1. MiR-124 expression in primary and cultured Müller cells.** After culturing rodent primary Müller cells, miR-124 expression decreased significantly with each passage as shown by an increased Ct (cycle threshold). After passage 4, miR-124 expression levels were similar to those of MIO-M1 cells (\*indicates significance using a Student's t-test or two-way ANOVA with Sidak's post hoc test for multiple comparisons,  $P < 0.05$  error bars indicate SEM,  $n=3$ ).
